# Supplementary material for: Preparation of photodegradable polyacrylamide hydrogels via micellar copolymerization and determination of their phototunable elasticity and swelling behaviors
Source: Royal Society of Chemistry journal article supplement (doi:10.1039/c6ra00556j), 2016-01-01
Supplement: c6ra00556j1.pdf [file c6ra00556j1.pdf]

## SUPPLEMENTARY INFORMATION

### **Preparation of photodegradable polyacrylamide hydrogels via micellar copolymerization and determination of their phototunable elasticity and swelling behaviors**

Fatma Selen<sup>1</sup>, Volkan Can<sup>2,3,\*</sup>, Gokhan Temel<sup>1,\*</sup>

<sup>1</sup> Yalova University, Polymer Engineering Department, Yalova, 77200, Turkey

<sup>2</sup> Helmholtz Institute, Lisa-Meitner Campus, Hahn-Meitner Platz 1, Berlin, 14109, Germany

<sup>3</sup> Istanbul Technical University, Department of Chemistry, Maslak, Istanbul, 34469, Turkey

Corresponding authors' email address: [gtemel@yalova.edu.tr](mailto:gtemel@yalova.edu.tr); [volkan.can@helmholtz-berlin.de](mailto:volkan.can@helmholtz-berlin.de)

## 1. FT-IR analysis:

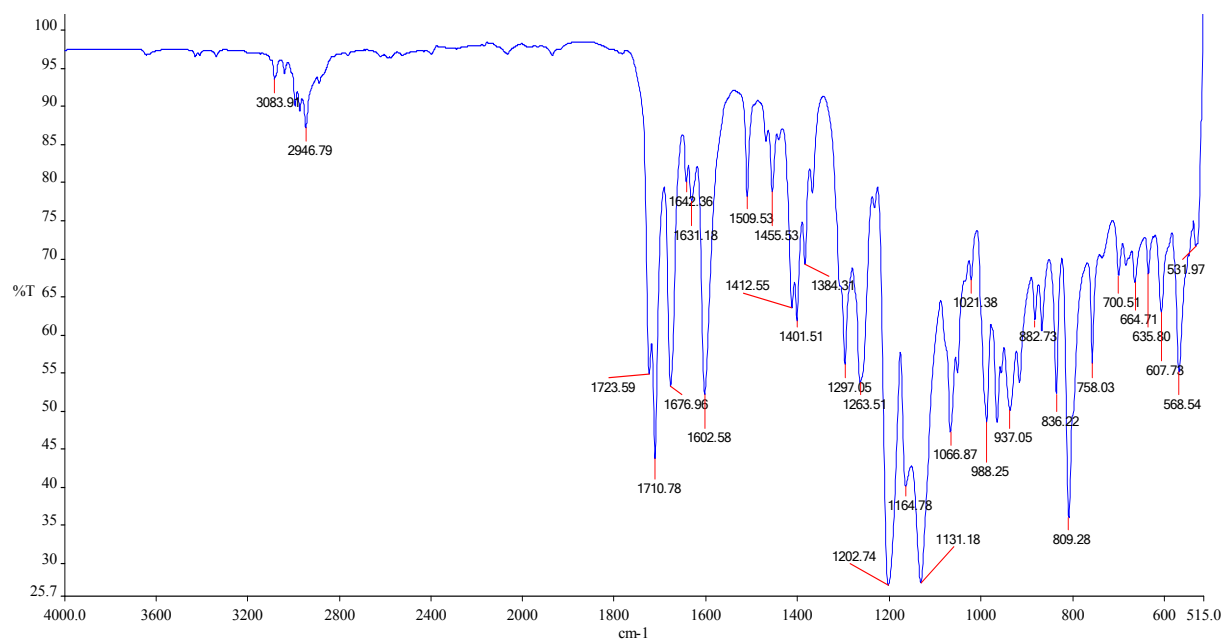

Figure 1s. FT-IR spectrum of diacrylated Irgacure-2959 (DAI).

## 2. $^1\text{H}$ NMR analysis:

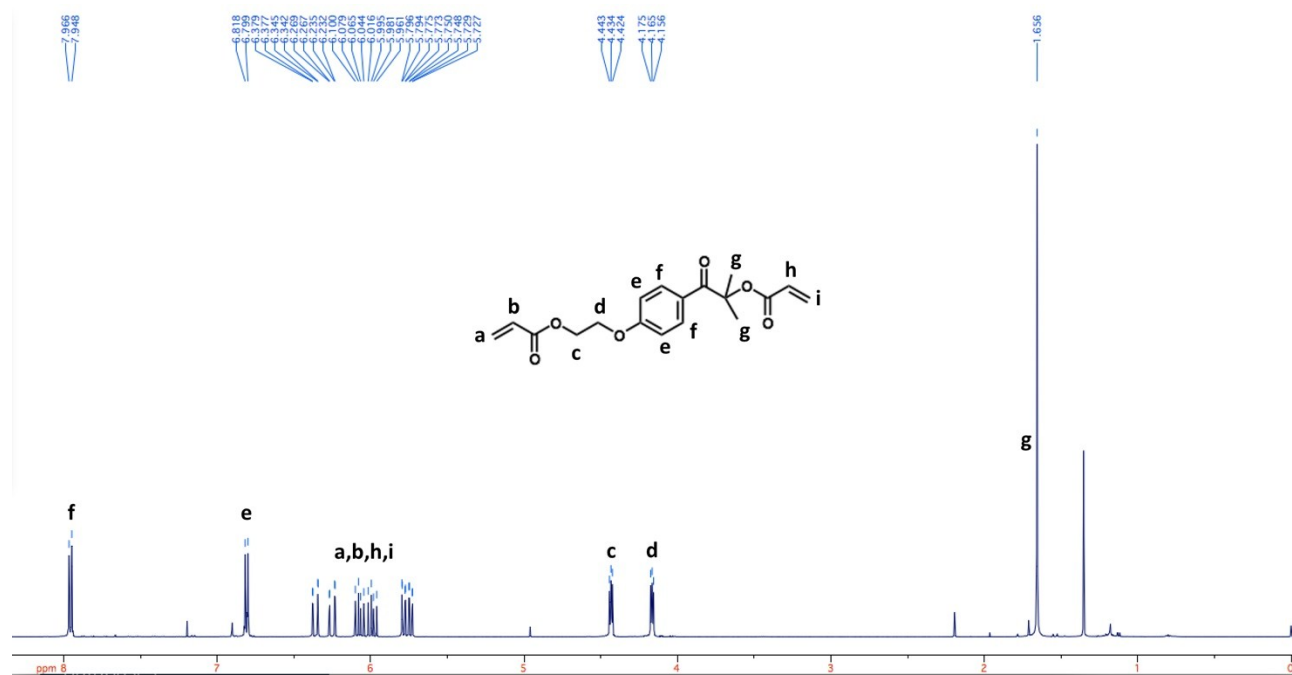

Figure 2s.  $^1\text{H}$  NMR spectrum of diacrylated Irgacure-2959 (DAI) in  $\text{CDCl}_3$ .
